# Supplementary material
Source: publisher figshare collection journal article supplement (https://acs.figshare.com/ndownloader/files/4280654)
Supplement: Supplementary file 1 [file 4280654]

 
data_sx2185 
 
_audit_creation_method            SHELXL-97 
_chemical_name_systematic 
; 
 ? 
; 
_chemical_name_common             ? 
_chemical_melting_point           ? 
_chemical_formula_moiety          ? 
_chemical_formula_sum 
 'C19 H30 N4 O4 S3' 
_chemical_formula_weight          474.65 
 
loop_ 
 _atom_type_symbol 
 _atom_type_description 
 _atom_type_scat_dispersion_real 
 _atom_type_scat_dispersion_imag 
 _atom_type_scat_source 
 'C'  'C'   0.0033   0.0016 
 'International Tables Vol C Tables 4.2.6.8 and 6.1.1.4' 
 'H'  'H'   0.0000   0.0000 
 'International Tables Vol C Tables 4.2.6.8 and 6.1.1.4' 
 'N'  'N'   0.0061   0.0033 
 'International Tables Vol C Tables 4.2.6.8 and 6.1.1.4' 
 'O'  'O'   0.0106   0.0060 
 'International Tables Vol C Tables 4.2.6.8 and 6.1.1.4' 
 'S'  'S'   0.1246   0.1234 
 'International Tables Vol C Tables 4.2.6.8 and 6.1.1.4' 
 
_symmetry_cell_setting            triclinic
_symmetry_space_group_name_H-M    P-1
 
loop_ 
 _symmetry_equiv_pos_as_xyz 
 'x, y, z' 
 '-x, -y, -z' 
 
_cell_length_a                    7.1206(14) 
_cell_length_b                    12.751(3) 
_cell_length_c                    14.523(3) 
_cell_angle_alpha                 107.73(3) 
_cell_angle_beta                  99.35(3) 
_cell_angle_gamma                 99.80(3) 
_cell_volume                      1204.9(4) 
_cell_formula_units_Z             2 
_cell_measurement_temperature     296(2) 
_cell_measurement_reflns_used     7847 
_cell_measurement_theta_min       2.65 
_cell_measurement_theta_max       25.00
 
_exptl_crystal_description        plate 
_exptl_crystal_colour             orange
_exptl_crystal_size_max           0.35 
_exptl_crystal_size_mid           0.25 
_exptl_crystal_size_min           0.12 
_exptl_crystal_density_meas       ? 
_exptl_crystal_density_diffrn     1.308 
_exptl_crystal_density_method     'not measured' 
_exptl_crystal_F_000              504 
_exptl_absorpt_coefficient_mu     0.339 
_exptl_absorpt_correction_type    multi-scan
_exptl_absorpt_correction_T_min   0.8906 
_exptl_absorpt_correction_T_max   0.9605 
_exptl_absorpt_process_details    
 'ABSCOR by T.Higashi    8 March, 1995' 
 
_exptl_special_details 
; 
 ? 
; 
 
_diffrn_ambient_temperature       296(2) 
_diffrn_radiation_wavelength      0.71069 
_diffrn_radiation_type            MoK\a 
_diffrn_radiation_source          'rotating anode' 
_diffrn_radiation_monochromator   graphite 
_diffrn_measurement_device_type   'Rigaku raxis Rapid IP Area Detector'
_diffrn_measurement_method        '\w scans at fixed \c = 45\%'
_diffrn_detector_area_resol_mean  ? 
_diffrn_standards_number          ? 
_diffrn_standards_interval_count  ? 
_diffrn_standards_interval_time   ? 
_diffrn_standards_decay_%         ? 
_diffrn_reflns_number             7847 
_diffrn_reflns_av_R_equivalents   0.0291 
_diffrn_reflns_av_sigmaI/netI     0.0473 
_diffrn_reflns_limit_h_min        -8 
_diffrn_reflns_limit_h_max        8 
_diffrn_reflns_limit_k_min        -15 
_diffrn_reflns_limit_k_max        15 
_diffrn_reflns_limit_l_min        -17 
_diffrn_reflns_limit_l_max        17 
_diffrn_reflns_theta_min          2.65 
_diffrn_reflns_theta_max          25.00 
_reflns_number_total              4244 
_reflns_number_gt                 3155 
_reflns_threshold_expression      >2sigma(I) 
 
_computing_data_collection        'Rapid Auto(Rigaku 2001)'  
_computing_cell_refinement        'Rapid Auto(Rigaku 2001)'  
_computing_data_reduction         'Rapid Auto(Rigaku 2001)' 
_computing_structure_solution     'SHELXS-97 (Sheldrick, 1990)' 
_computing_structure_refinement   'SHELXL-97 (Sheldrick, 1997)' 
_computing_molecular_graphics     'XP in Siemens SHELXTL (Sheldrick, 1994)' 
_computing_publication_material   'SHELX97 (Sheldrick, 1997)'
 
_refine_special_details 
; 
 Refinement of F^2^ against ALL reflections.  The weighted R-factor wR and 
 goodness of fit S are based on F^2^, conventional R-factors R are based 
 on F, with F set to zero for negative F^2^. The threshold expression of 
 F^2^ > 2sigma(F^2^) is used only for calculating R-factors(gt) etc. and is 
 not relevant to the choice of reflections for refinement.  R-factors based 
 on F^2^ are statistically about twice as large as those based on F, and R- 
 factors based on ALL data will be even larger. 
; 
 
_refine_ls_structure_factor_coef  Fsqd  
_refine_ls_matrix_type            full 
_refine_ls_weighting_scheme       calc  
_refine_ls_weighting_details 
 'calc w=1/[\s^2^(Fo^2^)+(0.0563P)^2^+0.3867P] where P=(Fo^2^+2Fc^2^)/3' 
_atom_sites_solution_primary      direct 
_atom_sites_solution_secondary    difmap 
_atom_sites_solution_hydrogens    geom 
_refine_ls_hydrogen_treatment     constr 
_refine_ls_extinction_method      none 
_refine_ls_extinction_coef        ? 
_refine_ls_number_reflns          4244 
_refine_ls_number_parameters      301 
_refine_ls_number_restraints      70 
_refine_ls_R_factor_all           0.0912 
_refine_ls_R_factor_gt            0.0614 
_refine_ls_wR_factor_ref          0.1338 
_refine_ls_wR_factor_gt           0.1238 
_refine_ls_goodness_of_fit_ref    1.108 
_refine_ls_restrained_S_all       1.117 
_refine_ls_shift/su_max           0.001 
_refine_ls_shift/su_mean          0.000 
 
loop_ 
 _atom_site_label 
 _atom_site_type_symbol 
 _atom_site_fract_x 
 _atom_site_fract_y 
 _atom_site_fract_z 
 _atom_site_U_iso_or_equiv 
 _atom_site_adp_type 
 _atom_site_occupancy 
 _atom_site_symmetry_multiplicity 
 _atom_site_calc_flag 
 _atom_site_refinement_flags 
 _atom_site_disorder_assembly 
 _atom_site_disorder_group 
S1 S 0.12921(12) 0.38002(7) 0.30746(7) 0.0507(3) Uani 1 1 d . . . 
O1 O -0.7619(3) -0.22937(17) -0.00330(15) 0.0450(5) Uani 1 1 d . . . 
O2 O -0.7931(3) -0.06397(19) 0.08702(17) 0.0571(6) Uani 1 1 d . . . 
N1 N -0.7427(4) -0.5988(2) -0.1997(2) 0.0559(7) Uani 1 1 d . . . 
N2 N -0.2033(3) 0.0800(2) 0.15460(18) 0.0410(6) Uani 1 1 d . . . 
N3 N -0.1400(3) 0.1922(2) 0.21209(18) 0.0427(6) Uani 1 1 d . . . 
H3B H -0.2218 0.2296 0.2351 0.051 Uiso 1 1 calc R . . 
N4 N 0.1682(4) 0.1832(2) 0.1917(2) 0.0525(7) Uani 1 1 d . . . 
H4B H 0.1222 0.1137 0.1538 0.063 Uiso 1 1 calc R . . 
H4C H 0.2909 0.2135 0.2032 0.063 Uiso 1 1 calc R . . 
C1 C -0.5764(8) -0.7002(4) -0.3241(3) 0.0980(16) Uani 1 1 d . . . 
H1A H -0.5081 -0.7598 -0.3392 0.147 Uiso 1 1 calc R . . 
H1B H -0.4918 -0.6301 -0.3180 0.147 Uiso 1 1 calc R . . 
H1C H -0.6904 -0.7174 -0.3765 0.147 Uiso 1 1 calc R . . 
C2 C -0.6378(6) -0.6897(3) -0.2276(3) 0.0659(10) Uani 1 1 d . . . 
H2B H -0.7219 -0.7610 -0.2338 0.079 Uiso 1 1 calc R . . 
H2C H -0.5226 -0.6743 -0.1753 0.079 Uiso 1 1 calc R . . 
C3 C -1.0493(6) -0.6719(3) -0.1571(3) 0.0806(12) Uani 1 1 d . . . 
H3C H -1.1889 -0.6939 -0.1816 0.121 Uiso 1 1 calc R . . 
H3D H -1.0166 -0.6112 -0.0945 0.121 Uiso 1 1 calc R . . 
H3E H -1.0024 -0.7354 -0.1487 0.121 Uiso 1 1 calc R . . 
C4 C -0.9550(5) -0.6329(3) -0.2306(3) 0.0617(10) Uani 1 1 d . . . 
H4D H -0.9922 -0.6938 -0.2943 0.074 Uiso 1 1 calc R . . 
H4E H -1.0046 -0.5694 -0.2395 0.074 Uiso 1 1 calc R . . 
C5 C -0.6466(5) -0.4914(3) -0.1406(2) 0.0457(8) Uani 1 1 d . . . 
C6 C -0.4406(5) -0.4561(3) -0.1188(2) 0.0520(9) Uani 1 1 d . . . 
H6A H -0.3683 -0.5081 -0.1434 0.062 Uiso 1 1 calc R . . 
C7 C -0.3457(5) -0.3481(3) -0.0628(2) 0.0500(8) Uani 1 1 d . . . 
H7A H -0.2101 -0.3274 -0.0515 0.060 Uiso 1 1 calc R . . 
C8 C -0.4472(4) -0.2666(2) -0.0211(2) 0.0399(7) Uani 1 1 d . . . 
C9 C -0.6508(4) -0.3033(2) -0.0424(2) 0.0396(7) Uani 1 1 d . . . 
C10 C -0.7517(5) -0.4107(3) -0.1004(2) 0.0454(8) Uani 1 1 d . . . 
H10A H -0.8877 -0.4304 -0.1131 0.054 Uiso 1 1 calc R . . 
C11 C -0.3604(4) -0.1535(3) 0.0378(2) 0.0420(7) Uani 1 1 d . . . 
H11A H -0.2252 -0.1279 0.0506 0.050 Uiso 1 1 calc R . . 
C12 C -0.4692(4) -0.0800(2) 0.0767(2) 0.0391(7) Uani 1 1 d . . . 
C13 C -0.6809(4) -0.1187(2) 0.0567(2) 0.0409(7) Uani 1 1 d . . . 
C14 C -0.3860(4) 0.0375(2) 0.1367(2) 0.0408(7) Uani 1 1 d . . . 
H14A H -0.4674 0.0829 0.1627 0.049 Uiso 1 1 calc R . . 
C15 C 0.0503(4) 0.2432(2) 0.2322(2) 0.0386(7) Uani 1 1 d . . . 
S2 S -1.40900(12) 0.33353(7) 0.41651(6) 0.0499(3) Uani 1 1 d . . . 
O3 O -1.4295(3) 0.25009(18) 0.31485(17) 0.0578(7) Uani 1 1 d . . . 
C16 C -1.3239(5) 0.4683(3) 0.4076(3) 0.0597(9) Uani 1 1 d . . . 
H16A H -1.4273 0.4867 0.3686 0.090 Uiso 1 1 calc R . . 
H16B H -1.2149 0.4667 0.3764 0.090 Uiso 1 1 calc R . . 
H16C H -1.2834 0.5244 0.4729 0.090 Uiso 1 1 calc R . . 
C17 C -1.1901(6) 0.3248(3) 0.4903(3) 0.0696(11) Uani 1 1 d . . . 
H17A H -1.2116 0.2545 0.5029 0.104 Uiso 1 1 calc R . . 
H17B H -1.1542 0.3867 0.5523 0.104 Uiso 1 1 calc R . . 
H17C H -1.0867 0.3284 0.4556 0.104 Uiso 1 1 calc R . . 
S3 S -0.7504(3) 0.00837(15) 0.43037(14) 0.0992(9) Uani 0.754(5) 1 d PDU A 1 
O4 O -0.795(4) -0.091(2) 0.450(2) 0.139(8) Uani 0.39(4) 1 d PDU A 1 
C19 C -0.958(2) 0.037(3) 0.3623(18) 0.138(7) Uani 0.55(3) 1 d PDU A 1 
H19A H -1.0538 0.0480 0.4015 0.207 Uiso 0.55(3) 1 calc PR A 1 
H19B H -1.0138 -0.0250 0.3015 0.207 Uiso 0.55(3) 1 calc PR A 1 
H19C H -0.9164 0.1050 0.3474 0.207 Uiso 0.55(3) 1 calc PR A 1 
S3' S -0.8472(12) -0.0434(5) 0.3559(6) 0.121(3) Uani 0.246(5) 1 d PDU A 2 
O4' O -0.855(3) -0.1102(7) 0.4159(12) 0.120(4) Uani 0.61(4) 1 d PDU A 2 
C19' C -0.889(4) 0.0921(15) 0.407(2) 0.120(7) Uani 0.45(3) 1 d PDU A 2 
H19D H -1.0178 0.0849 0.4200 0.180 Uiso 0.45(3) 1 calc PR A 2 
H19E H -0.8790 0.1320 0.3610 0.180 Uiso 0.45(3) 1 calc PR A 2 
H19F H -0.7935 0.1332 0.4679 0.180 Uiso 0.45(3) 1 calc PR A 2 
C18 C -0.6126(10) -0.0051(5) 0.3389(4) 0.127(2) Uani 1 1 d DU . . 
H18A H -0.4895 -0.0195 0.3636 0.190 Uiso 0.50 1 d P . . 
H18B H -0.5893 0.0645 0.3251 0.190 Uiso 0.50 1 d P . . 
H18C H -0.6830 -0.0660 0.2802 0.190 Uiso 0.50 1 d P . . 
H18D H -0.5672 -0.0714 0.3111 0.190 Uiso 0.50 1 d P . . 
H18E H -0.6140 0.0388 0.2959 0.190 Uiso 0.50 1 d P . . 
H18F H -0.5262 0.0402 0.4026 0.190 Uiso 0.50 1 d P . . 
 
loop_ 
 _atom_site_aniso_label 
 _atom_site_aniso_U_11 
 _atom_site_aniso_U_22 
 _atom_site_aniso_U_33 
 _atom_site_aniso_U_23 
 _atom_site_aniso_U_13 
 _atom_site_aniso_U_12 
S1 0.0405(5) 0.0366(4) 0.0603(6) 0.0002(4) 0.0070(4) 0.0049(3) 
O1 0.0382(11) 0.0362(11) 0.0498(13) 0.0008(10) 0.0096(10) 0.0064(9) 
O2 0.0437(13) 0.0443(13) 0.0691(16) -0.0037(11) 0.0178(11) 0.0116(10) 
N1 0.0585(18) 0.0359(15) 0.0596(18) 0.0017(13) 0.0080(14) 0.0074(13) 
N2 0.0406(15) 0.0357(14) 0.0389(14) 0.0033(11) 0.0075(11) 0.0078(11) 
N3 0.0342(14) 0.0350(14) 0.0477(15) -0.0005(12) 0.0075(11) 0.0080(11) 
N4 0.0369(14) 0.0403(15) 0.0681(19) 0.0000(13) 0.0172(13) 0.0071(12) 
C1 0.149(5) 0.080(3) 0.071(3) 0.011(2) 0.034(3) 0.059(3) 
C2 0.081(3) 0.040(2) 0.071(3) 0.0114(18) 0.012(2) 0.0180(18) 
C3 0.067(3) 0.066(3) 0.101(3) 0.025(2) 0.013(2) 0.005(2) 
C4 0.074(3) 0.0368(19) 0.055(2) 0.0028(16) -0.0083(19) 0.0075(17) 
C5 0.056(2) 0.0370(17) 0.0421(18) 0.0105(14) 0.0109(15) 0.0106(15) 
C6 0.054(2) 0.0419(19) 0.059(2) 0.0078(16) 0.0197(17) 0.0179(16) 
C7 0.0412(18) 0.049(2) 0.058(2) 0.0129(16) 0.0143(15) 0.0138(15) 
C8 0.0405(17) 0.0385(17) 0.0378(17) 0.0099(14) 0.0088(14) 0.0070(13) 
C9 0.0430(17) 0.0364(16) 0.0363(16) 0.0083(13) 0.0088(13) 0.0095(14) 
C10 0.0439(18) 0.0390(17) 0.0462(18) 0.0073(14) 0.0079(14) 0.0071(14) 
C11 0.0360(16) 0.0426(18) 0.0428(18) 0.0114(14) 0.0058(14) 0.0058(13) 
C12 0.0396(16) 0.0381(17) 0.0352(16) 0.0084(13) 0.0071(13) 0.0061(13) 
C13 0.0405(17) 0.0376(17) 0.0374(16) 0.0051(13) 0.0074(14) 0.0062(14) 
C14 0.0380(17) 0.0398(17) 0.0382(17) 0.0052(13) 0.0074(13) 0.0086(14) 
C15 0.0370(16) 0.0381(17) 0.0377(17) 0.0103(13) 0.0065(13) 0.0077(13) 
S2 0.0447(5) 0.0442(5) 0.0534(5) 0.0056(4) 0.0141(4) 0.0085(4) 
O3 0.0394(12) 0.0499(14) 0.0628(15) -0.0074(11) 0.0089(11) 0.0071(10) 
C16 0.057(2) 0.045(2) 0.069(2) 0.0103(17) 0.0098(18) 0.0113(16) 
C17 0.072(3) 0.064(3) 0.065(2) 0.017(2) 0.001(2) 0.017(2) 
S3 0.165(2) 0.0670(12) 0.0609(13) 0.0251(10) 0.0103(12) 0.0236(11) 
O4 0.172(13) 0.142(13) 0.136(14) 0.106(11) 0.019(10) 0.031(9) 
C19 0.156(11) 0.143(14) 0.150(12) 0.096(11) 0.024(9) 0.051(10) 
S3' 0.165(6) 0.078(4) 0.087(5) 0.011(4) 0.017(4) -0.013(4) 
O4' 0.200(9) 0.058(5) 0.094(7) 0.035(5) 0.036(7) -0.005(5) 
C19' 0.164(13) 0.086(10) 0.132(13) 0.057(9) 0.055(10) 0.027(9) 
C18 0.174(6) 0.105(4) 0.113(4) 0.054(4) 0.043(4) 0.024(4) 
 
_geom_special_details 
; 
 All esds (except the esd in the dihedral angle between two l.s. planes) 
 are estimated using the full covariance matrix.  The cell esds are taken 
 into account individually in the estimation of esds in distances, angles 
 and torsion angles; correlations between esds in cell parameters are only 
 used when they are defined by crystal symmetry.  An approximate (isotropic) 
 treatment of cell esds is used for estimating esds involving l.s. planes. 
; 
 
loop_ 
 _geom_bond_atom_site_label_1 
 _geom_bond_atom_site_label_2 
 _geom_bond_distance 
 _geom_bond_site_symmetry_2 
 _geom_bond_publ_flag 
S1 C15 1.691(3) . ? 
O1 C13 1.376(3) . ? 
O1 C9 1.383(3) . ? 
O2 C13 1.198(3) . ? 
N1 C5 1.362(4) . ? 
N1 C4 1.454(4) . ? 
N1 C2 1.473(4) . ? 
N2 C14 1.271(4) . ? 
N2 N3 1.370(3) . ? 
N3 C15 1.342(4) . ? 
N3 H3B 0.8600 . ? 
N4 C15 1.320(4) . ? 
N4 H4B 0.8600 . ? 
N4 H4C 0.8600 . ? 
C1 C2 1.510(6) . ? 
C1 H1A 0.9600 . ? 
C1 H1B 0.9600 . ? 
C1 H1C 0.9600 . ? 
C2 H2B 0.9700 . ? 
C2 H2C 0.9700 . ? 
C3 C4 1.510(5) . ? 
C3 H3C 0.9600 . ? 
C3 H3D 0.9600 . ? 
C3 H3E 0.9600 . ? 
C4 H4D 0.9700 . ? 
C4 H4E 0.9700 . ? 
C5 C6 1.412(4) . ? 
C5 C10 1.414(4) . ? 
C6 C7 1.355(4) . ? 
C6 H6A 0.9300 . ? 
C7 C8 1.409(4) . ? 
C7 H7A 0.9300 . ? 
C8 C9 1.397(4) . ? 
C8 C11 1.403(4) . ? 
C9 C10 1.366(4) . ? 
C10 H10A 0.9300 . ? 
C11 C12 1.366(4) . ? 
C11 H11A 0.9300 . ? 
C12 C14 1.446(4) . ? 
C12 C13 1.455(4) . ? 
C14 H14A 0.9300 . ? 
S2 O3 1.501(2) . ? 
S2 C16 1.773(4) . ? 
S2 C17 1.783(4) . ? 
C16 H16A 0.9600 . ? 
C16 H16B 0.9600 . ? 
C16 H16C 0.9600 . ? 
C17 H17A 0.9600 . ? 
C17 H17B 0.9600 . ? 
C17 H17C 0.9600 . ? 
S3 O4 1.384(12) . ? 
S3 C18 1.760(6) . ? 
S3 C19 1.798(10) . ? 
S3 H18F 1.721(2) . ? 
C19 H19A 0.9600 . ? 
C19 H19B 0.9600 . ? 
C19 H19C 0.9600 . ? 
S3' O4' 1.393(11) . ? 
S3' C18 1.738(9) . ? 
S3' C19' 1.758(12) . ? 
S3' H18C 1.731(7) . ? 
C19' H19D 0.9600 . ? 
C19' H19E 0.9600 . ? 
C19' H19F 0.9600 . ? 
C18 H18A 0.961(7) . ? 
C18 H18B 0.961(6) . ? 
C18 H18C 0.952(6) . ? 
C18 H18D 0.954(6) . ? 
C18 H18E 0.957(6) . ? 
C18 H18F 0.968(6) . ? 
 
loop_ 
 _geom_angle_atom_site_label_1 
 _geom_angle_atom_site_label_2 
 _geom_angle_atom_site_label_3 
 _geom_angle 
 _geom_angle_site_symmetry_1 
 _geom_angle_site_symmetry_3 
 _geom_angle_publ_flag 
C13 O1 C9 122.8(2) . . ? 
C5 N1 C4 122.0(3) . . ? 
C5 N1 C2 121.6(3) . . ? 
C4 N1 C2 116.1(3) . . ? 
C14 N2 N3 116.3(2) . . ? 
C15 N3 N2 119.6(2) . . ? 
C15 N3 H3B 120.2 . . ? 
N2 N3 H3B 120.2 . . ? 
C15 N4 H4B 120.0 . . ? 
C15 N4 H4C 120.0 . . ? 
H4B N4 H4C 120.0 . . ? 
C2 C1 H1A 109.5 . . ? 
C2 C1 H1B 109.5 . . ? 
H1A C1 H1B 109.5 . . ? 
C2 C1 H1C 109.5 . . ? 
H1A C1 H1C 109.5 . . ? 
H1B C1 H1C 109.5 . . ? 
N1 C2 C1 112.2(3) . . ? 
N1 C2 H2B 109.2 . . ? 
C1 C2 H2B 109.2 . . ? 
N1 C2 H2C 109.2 . . ? 
C1 C2 H2C 109.2 . . ? 
H2B C2 H2C 107.9 . . ? 
C4 C3 H3C 109.5 . . ? 
C4 C3 H3D 109.5 . . ? 
H3C C3 H3D 109.5 . . ? 
C4 C3 H3E 109.5 . . ? 
H3C C3 H3E 109.5 . . ? 
H3D C3 H3E 109.5 . . ? 
N1 C4 C3 113.1(3) . . ? 
N1 C4 H4D 109.0 . . ? 
C3 C4 H4D 109.0 . . ? 
N1 C4 H4E 109.0 . . ? 
C3 C4 H4E 109.0 . . ? 
H4D C4 H4E 107.8 . . ? 
N1 C5 C6 121.6(3) . . ? 
N1 C5 C10 120.6(3) . . ? 
C6 C5 C10 117.7(3) . . ? 
C7 C6 C5 121.5(3) . . ? 
C7 C6 H6A 119.2 . . ? 
C5 C6 H6A 119.2 . . ? 
C6 C7 C8 121.7(3) . . ? 
C6 C7 H7A 119.2 . . ? 
C8 C7 H7A 119.2 . . ? 
C9 C8 C11 118.7(3) . . ? 
C9 C8 C7 116.0(3) . . ? 
C11 C8 C7 125.3(3) . . ? 
C10 C9 O1 116.1(3) . . ? 
C10 C9 C8 123.9(3) . . ? 
O1 C9 C8 119.9(2) . . ? 
C9 C10 C5 119.0(3) . . ? 
C9 C10 H10A 120.5 . . ? 
C5 C10 H10A 120.5 . . ? 
C12 C11 C8 121.7(3) . . ? 
C12 C11 H11A 119.2 . . ? 
C8 C11 H11A 119.2 . . ? 
C11 C12 C14 123.5(3) . . ? 
C11 C12 C13 119.8(3) . . ? 
C14 C12 C13 116.7(3) . . ? 
O2 C13 O1 116.2(3) . . ? 
O2 C13 C12 126.7(3) . . ? 
O1 C13 C12 117.1(3) . . ? 
N2 C14 C12 121.1(3) . . ? 
N2 C14 H14A 119.4 . . ? 
C12 C14 H14A 119.4 . . ? 
N4 C15 N3 117.8(3) . . ? 
N4 C15 S1 122.9(2) . . ? 
N3 C15 S1 119.4(2) . . ? 
O3 S2 C16 105.25(17) . . ? 
O3 S2 C17 105.52(16) . . ? 
C16 S2 C17 98.53(18) . . ? 
S2 C16 H16A 109.5 . . ? 
S2 C16 H16B 109.5 . . ? 
H16A C16 H16B 109.5 . . ? 
S2 C16 H16C 109.5 . . ? 
H16A C16 H16C 109.5 . . ? 
H16B C16 H16C 109.5 . . ? 
S2 C17 H17A 109.5 . . ? 
S2 C17 H17B 109.5 . . ? 
H17A C17 H17B 109.5 . . ? 
S2 C17 H17C 109.5 . . ? 
H17A C17 H17C 109.5 . . ? 
H17B C17 H17C 109.5 . . ? 
O4 S3 C18 111.4(10) . . ? 
O4 S3 C19 113.4(13) . . ? 
C18 S3 C19 96.7(5) . . ? 
O4 S3 H18F 116.4(8) . . ? 
C18 S3 H18F 32.3(2) . . ? 
C19 S3 H18F 118.5(5) . . ? 
S3 C19 H19A 109.5 . . ? 
S3 C19 H19B 109.5 . . ? 
H19A C19 H19B 109.5 . . ? 
S3 C19 H19C 109.5 . . ? 
H19A C19 H19C 109.5 . . ? 
H19B C19 H19C 109.5 . . ? 
O4' S3' C18 111.9(9) . . ? 
O4' S3' C19' 115.5(8) . . ? 
C18 S3' C19' 99.4(7) . . ? 
O4' S3' H18C 114.2(7) . . ? 
C18 S3' H18C 31.9(2) . . ? 
C19' S3' H18C 121.1(6) . . ? 
S3' C19' H19D 109.5 . . ? 
S3' C19' H19E 109.5 . . ? 
H19D C19' H19E 109.5 . . ? 
S3' C19' H19F 109.5 . . ? 
H19D C19' H19F 109.5 . . ? 
H19E C19' H19F 109.5 . . ? 
S3' C18 S3 37.3(3) . . ? 
S3' C18 H18A 133.0(6) . . ? 
S3 C18 H18A 109.0(4) . . ? 
S3' C18 H18B 113.0(6) . . ? 
S3 C18 H18B 109.0(5) . . ? 
H18A C18 H18B 109.3(6) . . ? 
S3' C18 H18C 73.7(5) . . ? 
S3 C18 H18C 109.5(5) . . ? 
H18A C18 H18C 110.1(6) . . ? 
H18B C18 H18C 110.0(6) . . ? 
S3' C18 H18D 109.7(5) . . ? 
S3 C18 H18D 123.3(5) . . ? 
H18A C18 H18D 54.0(4) . . ? 
H18B C18 H18D 127.7(6) . . ? 
H18C C18 H18D 56.1(3) . . ? 
S3' C18 H18E 109.5(6) . . ? 
S3 C18 H18E 123.2(5) . . ? 
H18A C18 H18E 117.5(6) . . ? 
H18B C18 H18E 26.28(15) . . ? 
H18C C18 H18E 84.0(5) . . ? 
H18D C18 H18E 110.2(6) . . ? 
S3' C18 H18F 109.0(5) . . ? 
S3 C18 H18F 71.7(3) . . ? 
H18A C18 H18F 56.1(4) . . ? 
H18B C18 H18F 83.8(5) . . ? 
H18C C18 H18F 164.0(7) . . ? 
H18D C18 H18F 109.3(6) . . ? 
H18E C18 H18F 109.1(6) . . ? 
 
loop_ 
 _geom_torsion_atom_site_label_1 
 _geom_torsion_atom_site_label_2 
 _geom_torsion_atom_site_label_3 
 _geom_torsion_atom_site_label_4 
 _geom_torsion 
 _geom_torsion_site_symmetry_1 
 _geom_torsion_site_symmetry_2 
 _geom_torsion_site_symmetry_3 
 _geom_torsion_site_symmetry_4 
 _geom_torsion_publ_flag 
C14 N2 N3 C15 -178.6(3) . . . . ? 
C5 N1 C2 C1 -91.9(4) . . . . ? 
C4 N1 C2 C1 94.0(4) . . . . ? 
C5 N1 C4 C3 -87.2(4) . . . . ? 
C2 N1 C4 C3 86.8(4) . . . . ? 
C4 N1 C5 C6 -173.8(3) . . . . ? 
C2 N1 C5 C6 12.4(5) . . . . ? 
C4 N1 C5 C10 5.1(5) . . . . ? 
C2 N1 C5 C10 -168.7(3) . . . . ? 
N1 C5 C6 C7 177.7(3) . . . . ? 
C10 C5 C6 C7 -1.2(5) . . . . ? 
C5 C6 C7 C8 1.8(5) . . . . ? 
C6 C7 C8 C9 -0.9(5) . . . . ? 
C6 C7 C8 C11 179.8(3) . . . . ? 
C13 O1 C9 C10 179.8(3) . . . . ? 
C13 O1 C9 C8 0.2(4) . . . . ? 
C11 C8 C9 C10 178.7(3) . . . . ? 
C7 C8 C9 C10 -0.6(5) . . . . ? 
C11 C8 C9 O1 -1.7(4) . . . . ? 
C7 C8 C9 O1 179.0(3) . . . . ? 
O1 C9 C10 C5 -178.5(3) . . . . ? 
C8 C9 C10 C5 1.2(5) . . . . ? 
N1 C5 C10 C9 -179.2(3) . . . . ? 
C6 C5 C10 C9 -0.2(5) . . . . ? 
C9 C8 C11 C12 1.8(5) . . . . ? 
C7 C8 C11 C12 -178.9(3) . . . . ? 
C8 C11 C12 C14 -179.2(3) . . . . ? 
C8 C11 C12 C13 -0.4(5) . . . . ? 
C9 O1 C13 O2 -178.8(3) . . . . ? 
C9 O1 C13 C12 1.2(4) . . . . ? 
C11 C12 C13 O2 178.9(3) . . . . ? 
C14 C12 C13 O2 -2.2(5) . . . . ? 
C11 C12 C13 O1 -1.1(4) . . . . ? 
C14 C12 C13 O1 177.8(3) . . . . ? 
N3 N2 C14 C12 179.9(3) . . . . ? 
C11 C12 C14 N2 1.7(5) . . . . ? 
C13 C12 C14 N2 -177.0(3) . . . . ? 
N2 N3 C15 N4 2.7(4) . . . . ? 
N2 N3 C15 S1 -177.2(2) . . . . ? 
O4' S3' C18 S3 -62.2(7) . . . . ? 
C19' S3' C18 S3 60.3(10) . . . . ? 
O4 S3 C18 S3' 74.4(15) . . . . ? 
C19 S3 C18 S3' -44.0(11) . . . . ? 
 
loop_ 
 _geom_hbond_atom_site_label_D 
 _geom_hbond_atom_site_label_H 
 _geom_hbond_atom_site_label_A 
 _geom_hbond_distance_DH 
 _geom_hbond_distance_HA 
 _geom_hbond_distance_DA 
 _geom_hbond_angle_DHA 
 _geom_hbond_site_symmetry_A 
N3 H3B O3  0.86 2.03 2.805(3) 150.4 1_655 
N4 H4B O2  0.86 2.40 3.136(3) 143.9 1_655 
N4 H4C O3  0.86 2.23 2.951(4) 141.0 1_755 
 
_diffrn_measured_fraction_theta_max    0.999 
_diffrn_reflns_theta_full              25.00 
_diffrn_measured_fraction_theta_full   0.999 
_refine_diff_density_max    0.304 
_refine_diff_density_min   -0.186 
_refine_diff_density_rms    0.044 
